# Supplementary material for: Cyclopenta[c]thiophene oligomers based solution processable D–A copolymers and their application as FET materials
Source: Royal Society of Chemistry journal article supplement (doi:10.1039/c2py20032e), 2012-01-01
Supplement: c2py20032e.pdf [file c2py20032e.pdf]

# Supporting Information

## Cyclopenta[*c*]thiophene oligomers based solution processable D-A copolymers and their application as FET materials

Anjan Bedi<sup>a</sup>, Satyaprasad P. Senanayak<sup>b</sup>, Soumyajit Das<sup>a</sup>, K.S. Narayan<sup>b\*</sup>, Sanjio S. Zade<sup>a\*</sup>

<sup>a</sup>*Department of Chemical Sciences, Indian Institute of Science Education and Research, Kolkata,*

*PO: BCKV campus main office, Mohanpur 741252, Nadia, West Bengal, India.*

<sup>b</sup>*Chemistry and Physics of Materials Unit, Jawaharlal Nehru Centre for Advanced Scientific*

*Research, Bangalore 560064, Karnataka, India*

[\*] email: [sanjiozade@iiserkol.ac.in](mailto:sanjiozade@iiserkol.ac.in), [narayan@jncasr.ac.in](mailto:narayan@jncasr.ac.in)

### Contents

|                                                                        |                 |
|------------------------------------------------------------------------|-----------------|
| <b>Figure S1.</b> <sup>1</sup> H NMR of newly synthesised <b>2a</b>    | Page <b>S3</b>  |
| <b>Figure S2.</b> <sup>13</sup> C NMR of newly synthesised <b>2a</b>   | Page <b>S4</b>  |
| <b>Figure S3.</b> <sup>1</sup> H NMR of newly synthesised <b>3a</b>    | Page <b>S5</b>  |
| <b>Figure S4.</b> <sup>1</sup> H NMR of newly synthesised <b>3a</b>    | Page <b>S6</b>  |
| <b>Figure S5.</b> <sup>1</sup> H NMR of previously reported <b>4a</b>  | Page <b>S7</b>  |
| <b>Figure S6.</b> <sup>13</sup> C NMR of previously reported <b>4a</b> | Page <b>S8</b>  |
| <b>Figure S7.</b> <sup>1</sup> H NMR of newly synthesised <b>4b</b>    | Page <b>S9</b>  |
| <b>Figure S8.</b> <sup>13</sup> C NMR of newly synthesised <b>4b</b>   | Page <b>S10</b> |

|                                                                     |                 |
|---------------------------------------------------------------------|-----------------|
| <b>Figure S9.</b> $^1\text{H}$ NMR of newly synthesised <b>5a</b>   | Page <b>S11</b> |
| <b>Figure S10.</b> $^1\text{H}$ NMR of newly synthesised <b>5b</b>  | Page <b>S12</b> |
| <b>Figure S5.</b> $^1\text{H}$ NMR of previously reported <b>6</b>  | Page <b>S13</b> |
| <b>Figure S11.</b> $^1\text{H}$ NMR of previously reported <b>7</b> | Page <b>S14</b> |
| <b>Figure S12.</b> $^1\text{H}$ NMR of newly synthesised <b>P1</b>  | Page <b>S15</b> |
| <b>Figure S13.</b> $^1\text{H}$ NMR of newly synthesised <b>P2</b>  | Page <b>S16</b> |
| <b>Figure S14.</b> PXRD of the polymers                             | Page <b>S16</b> |

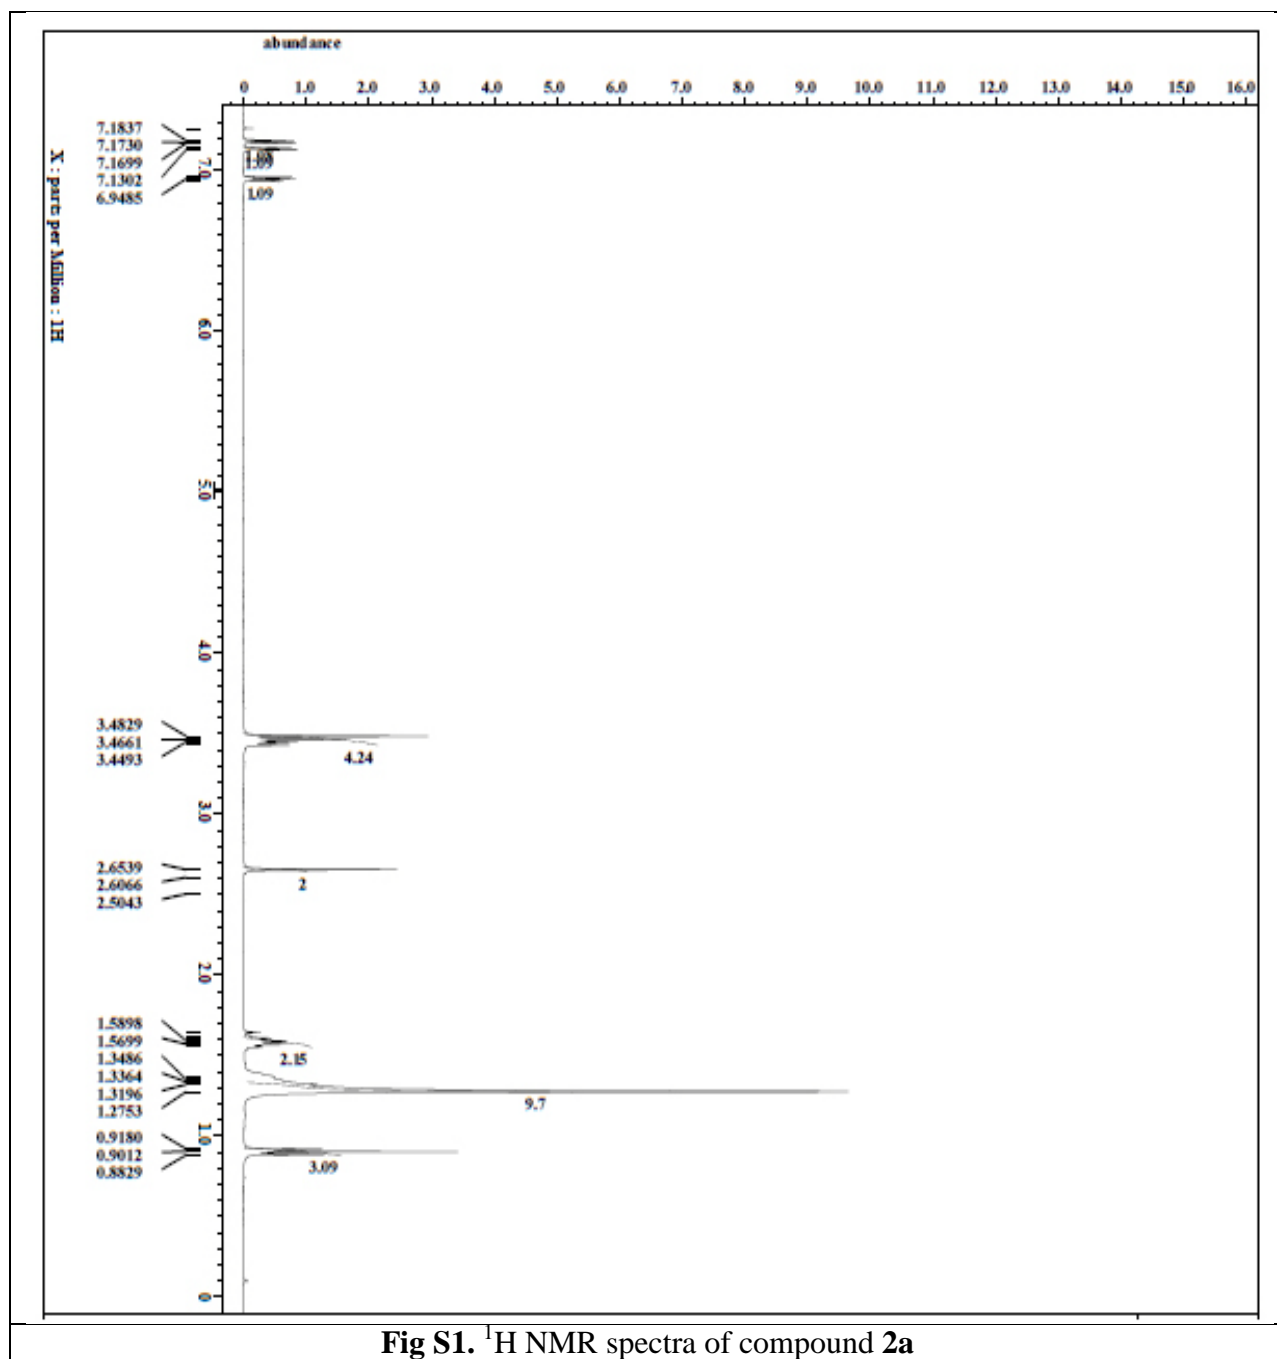

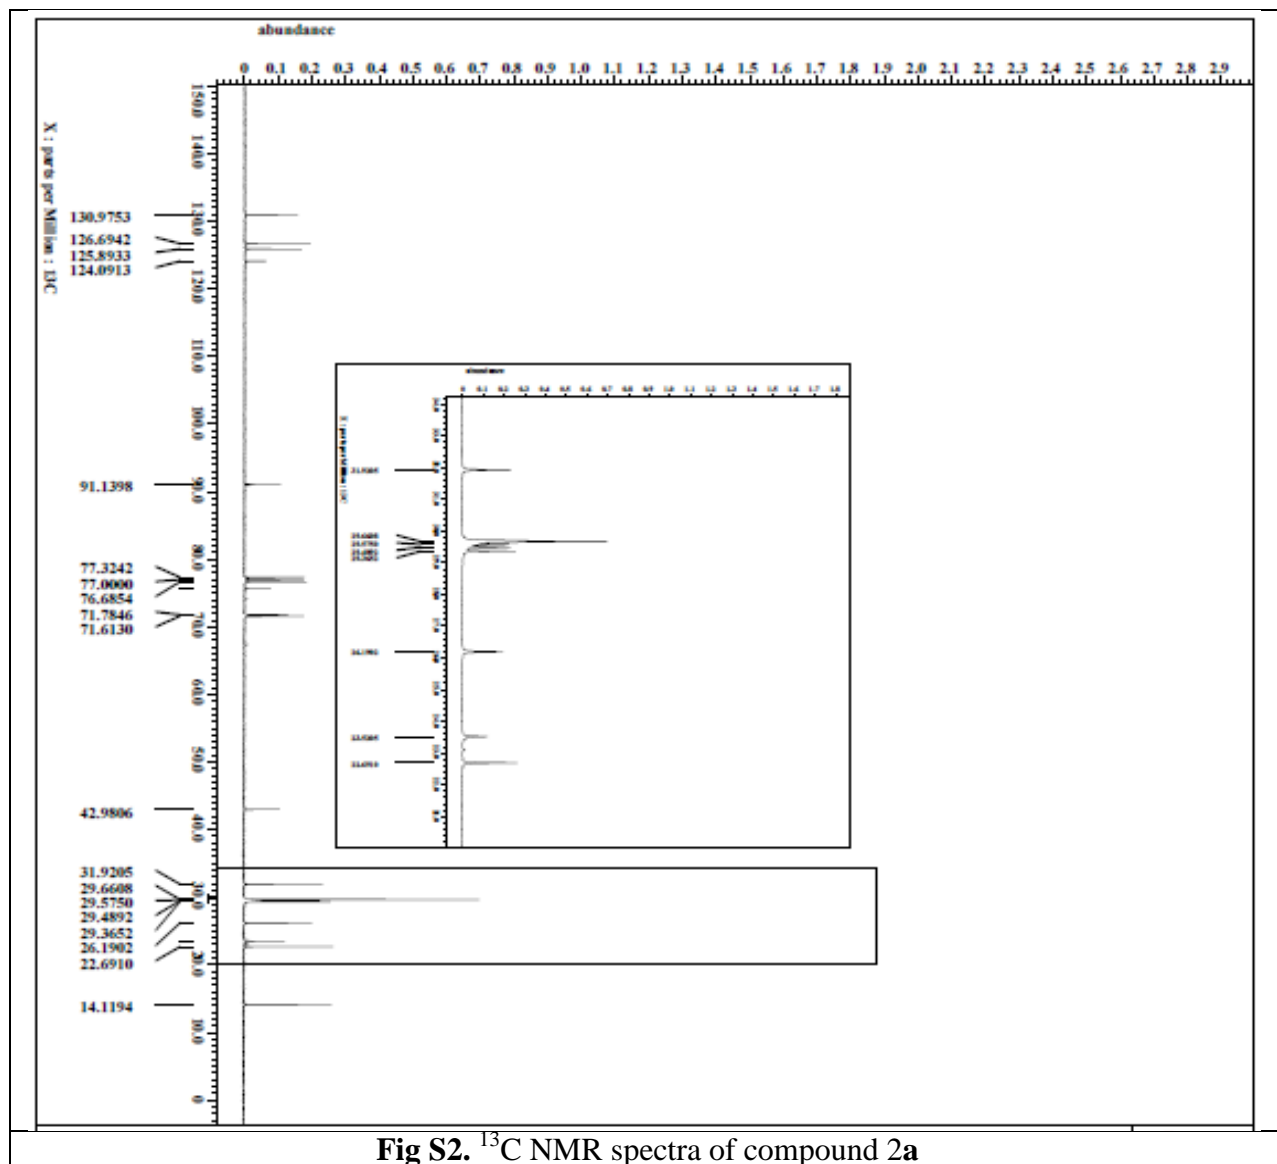

Fig S2.  $^{13}\text{C}$  NMR spectra of compound 2a

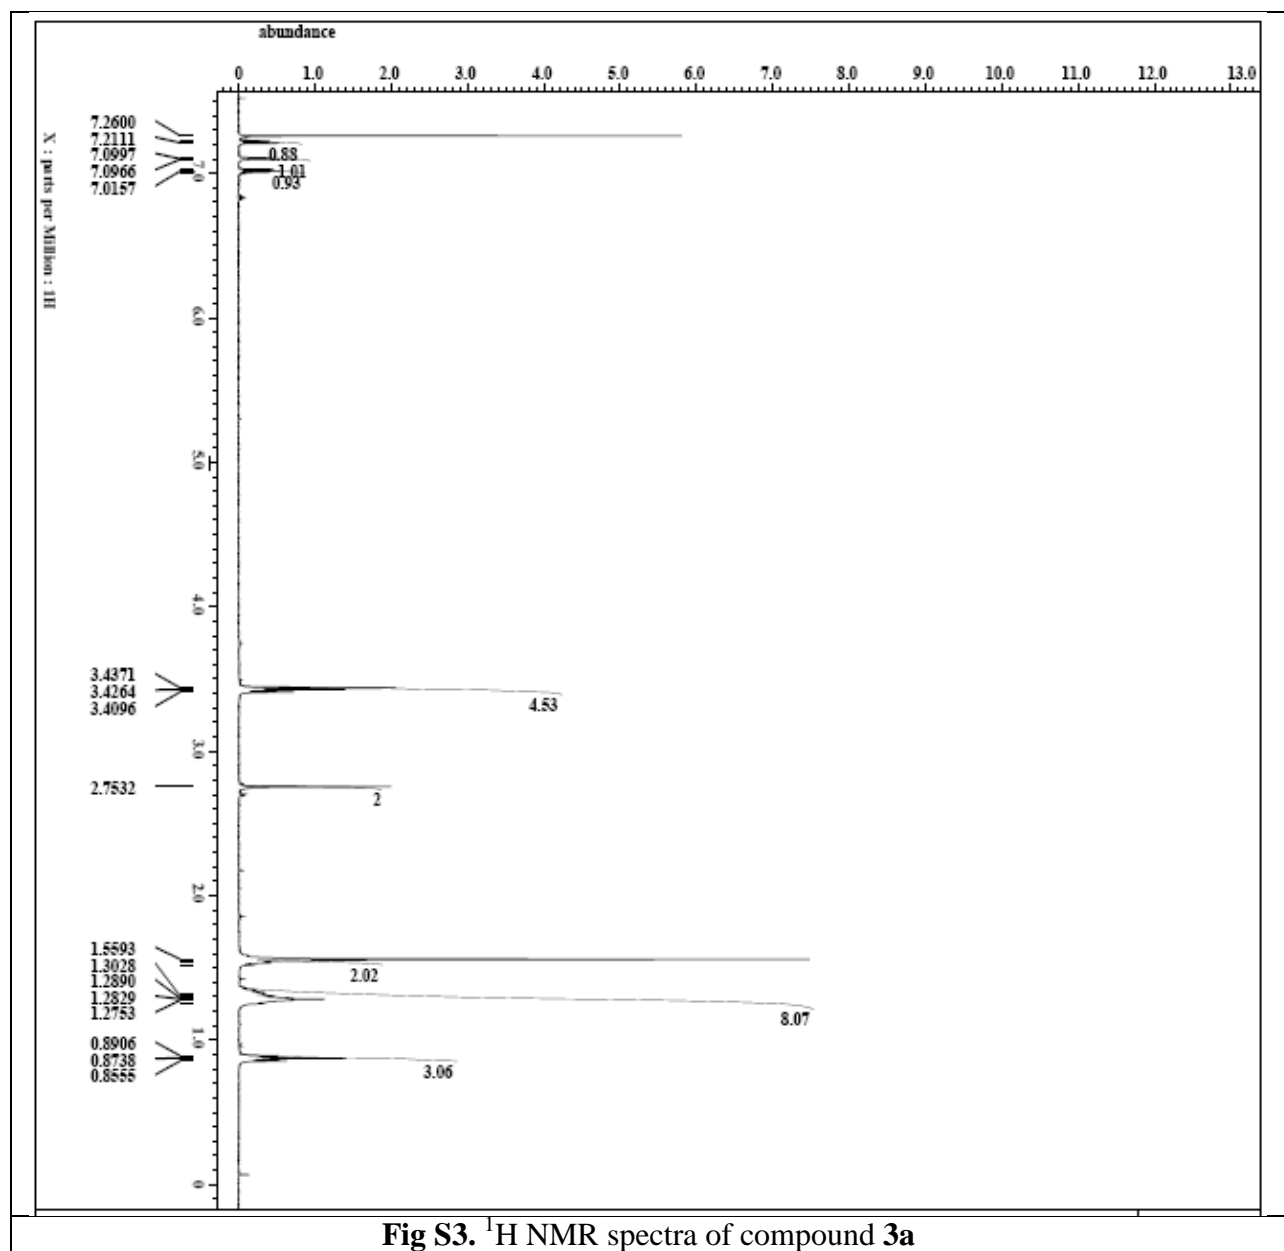

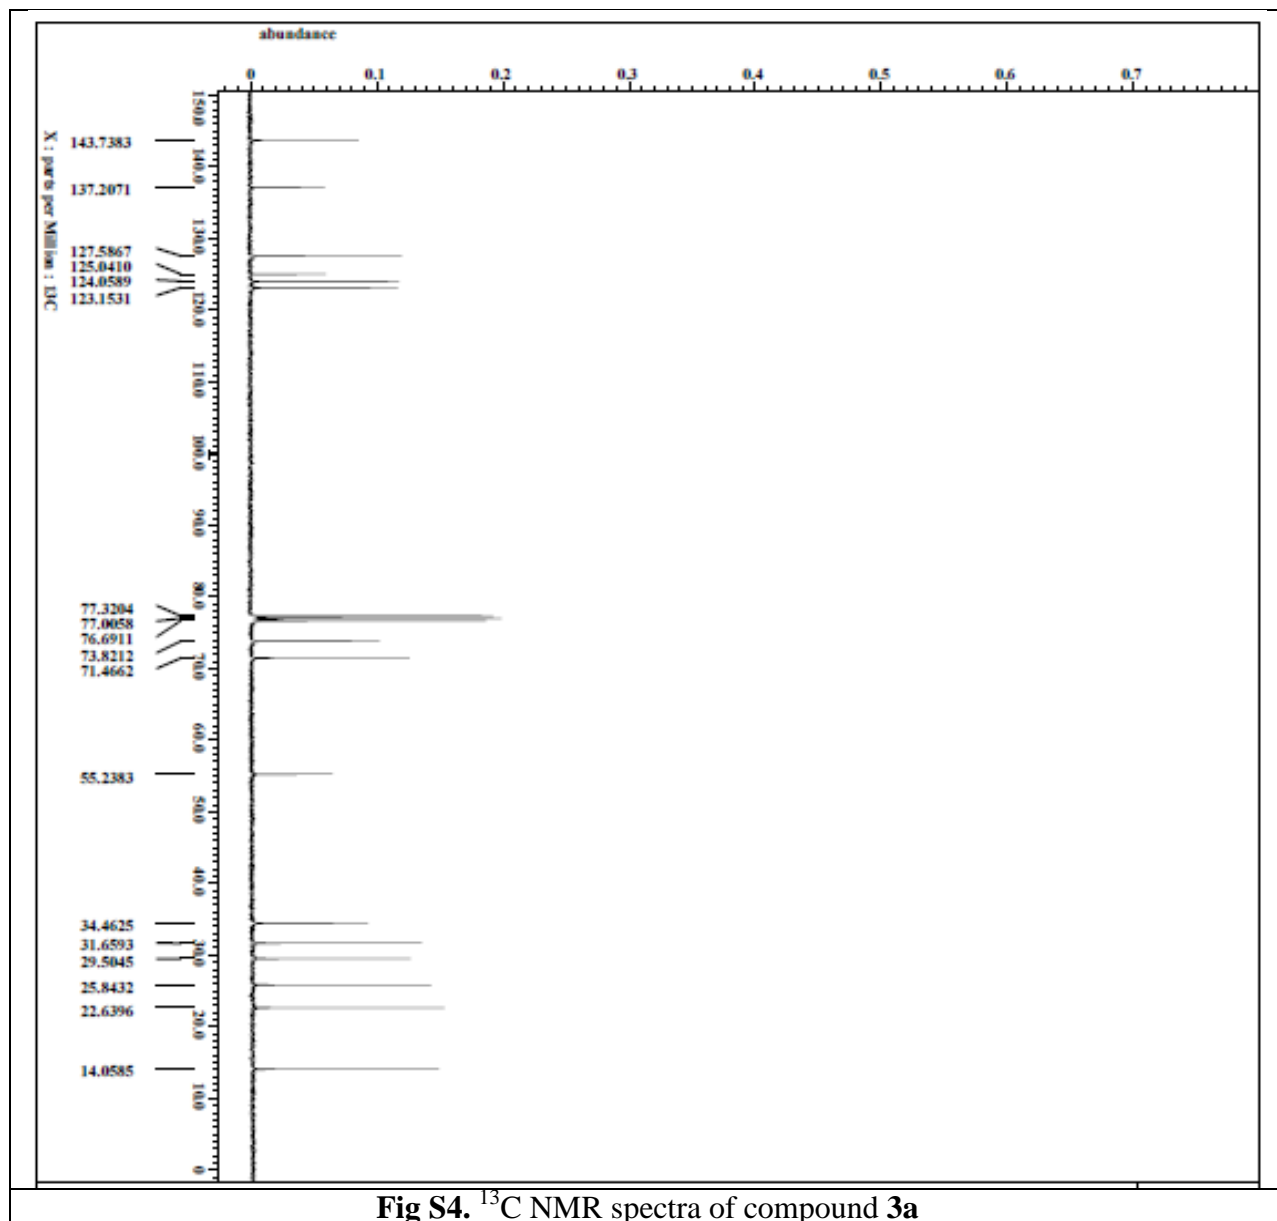

**Fig S4.**  $^{13}\text{C}$  NMR spectra of compound **3a**

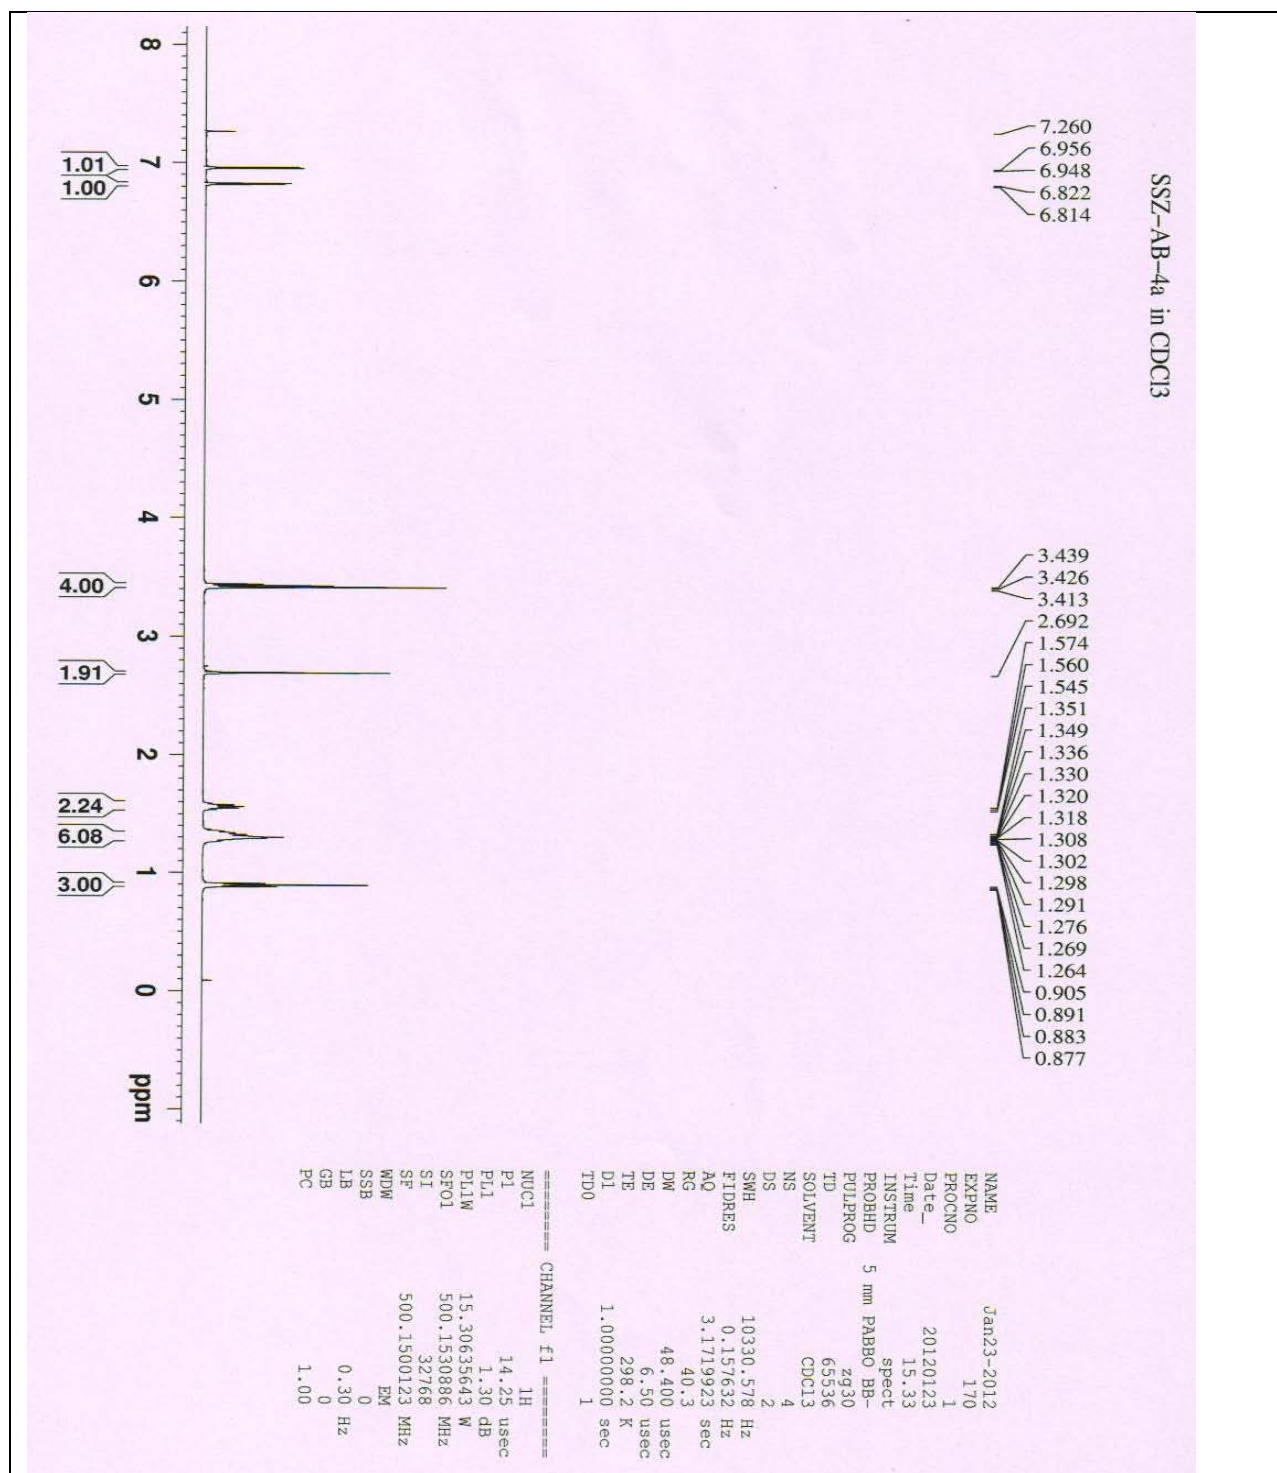

**Fig S5.** <sup>1</sup>H NMR spectra of compound **4a**

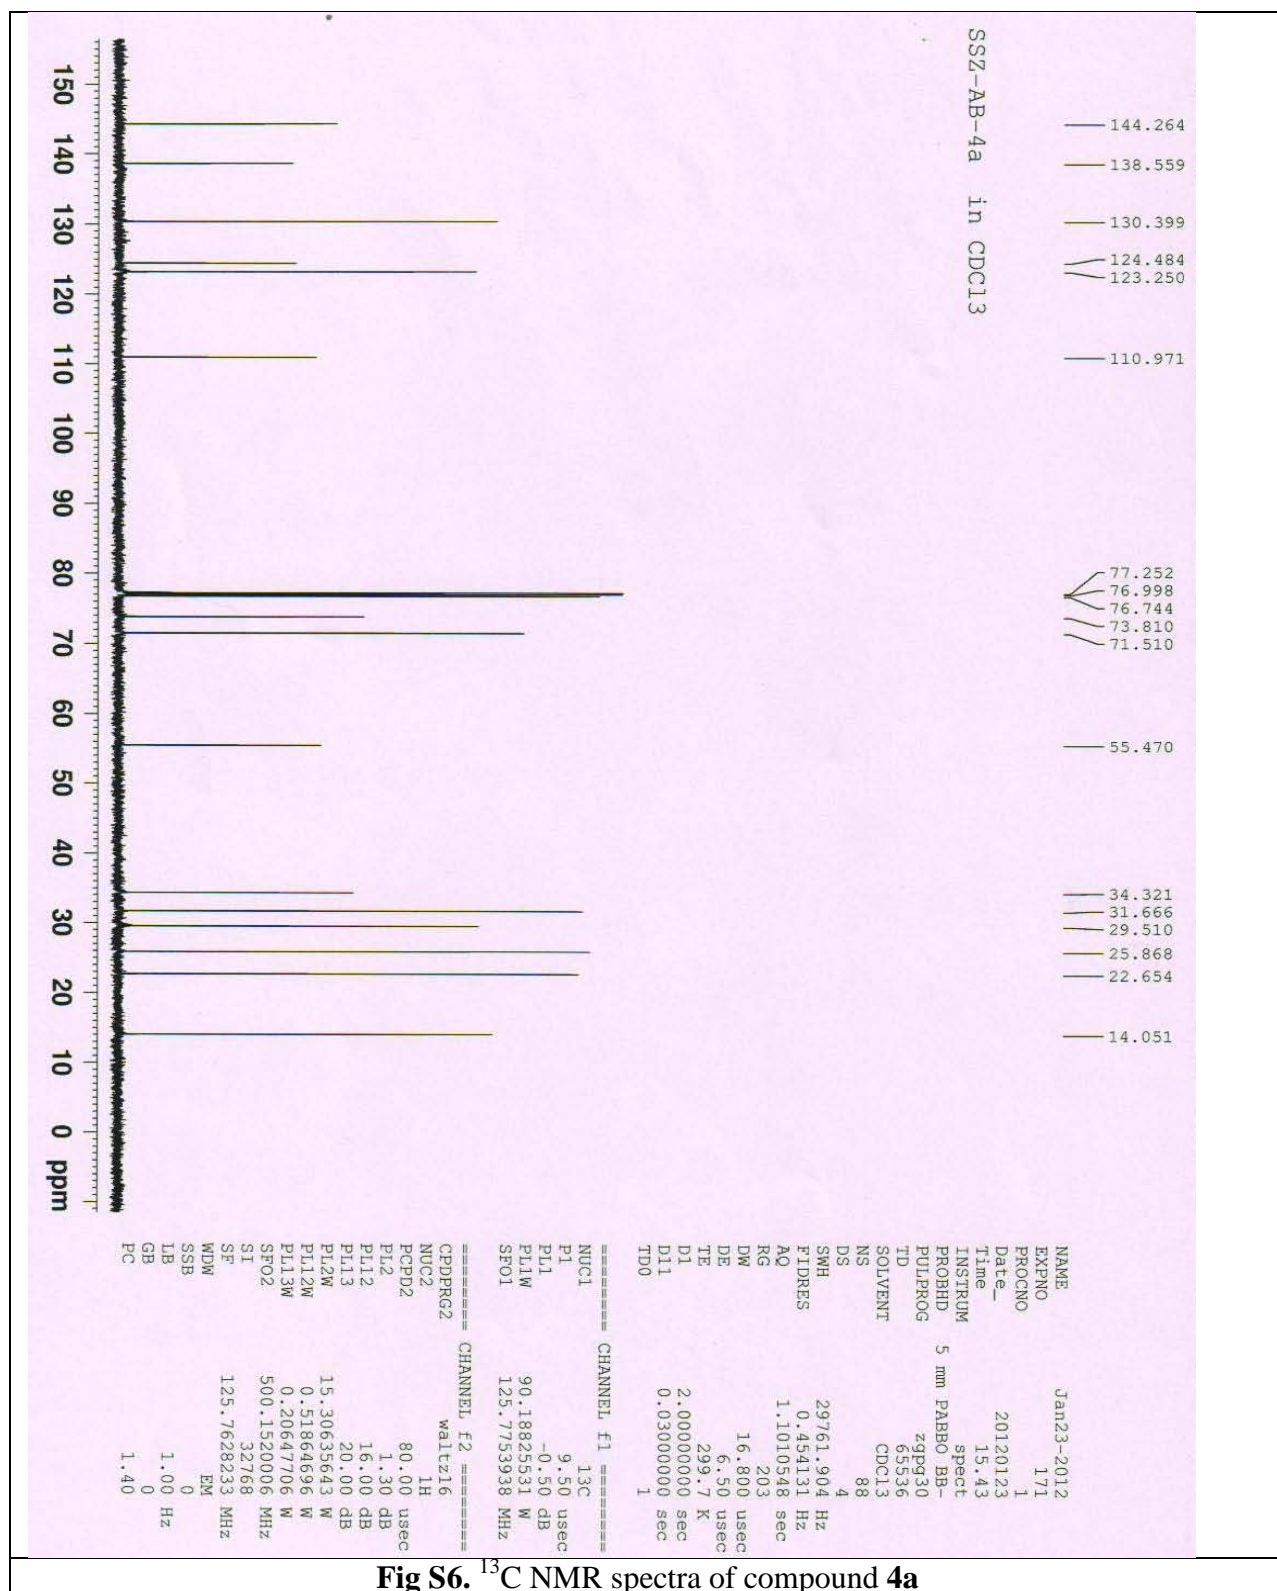

Fig S6. <sup>13</sup>C NMR spectra of compound 4a



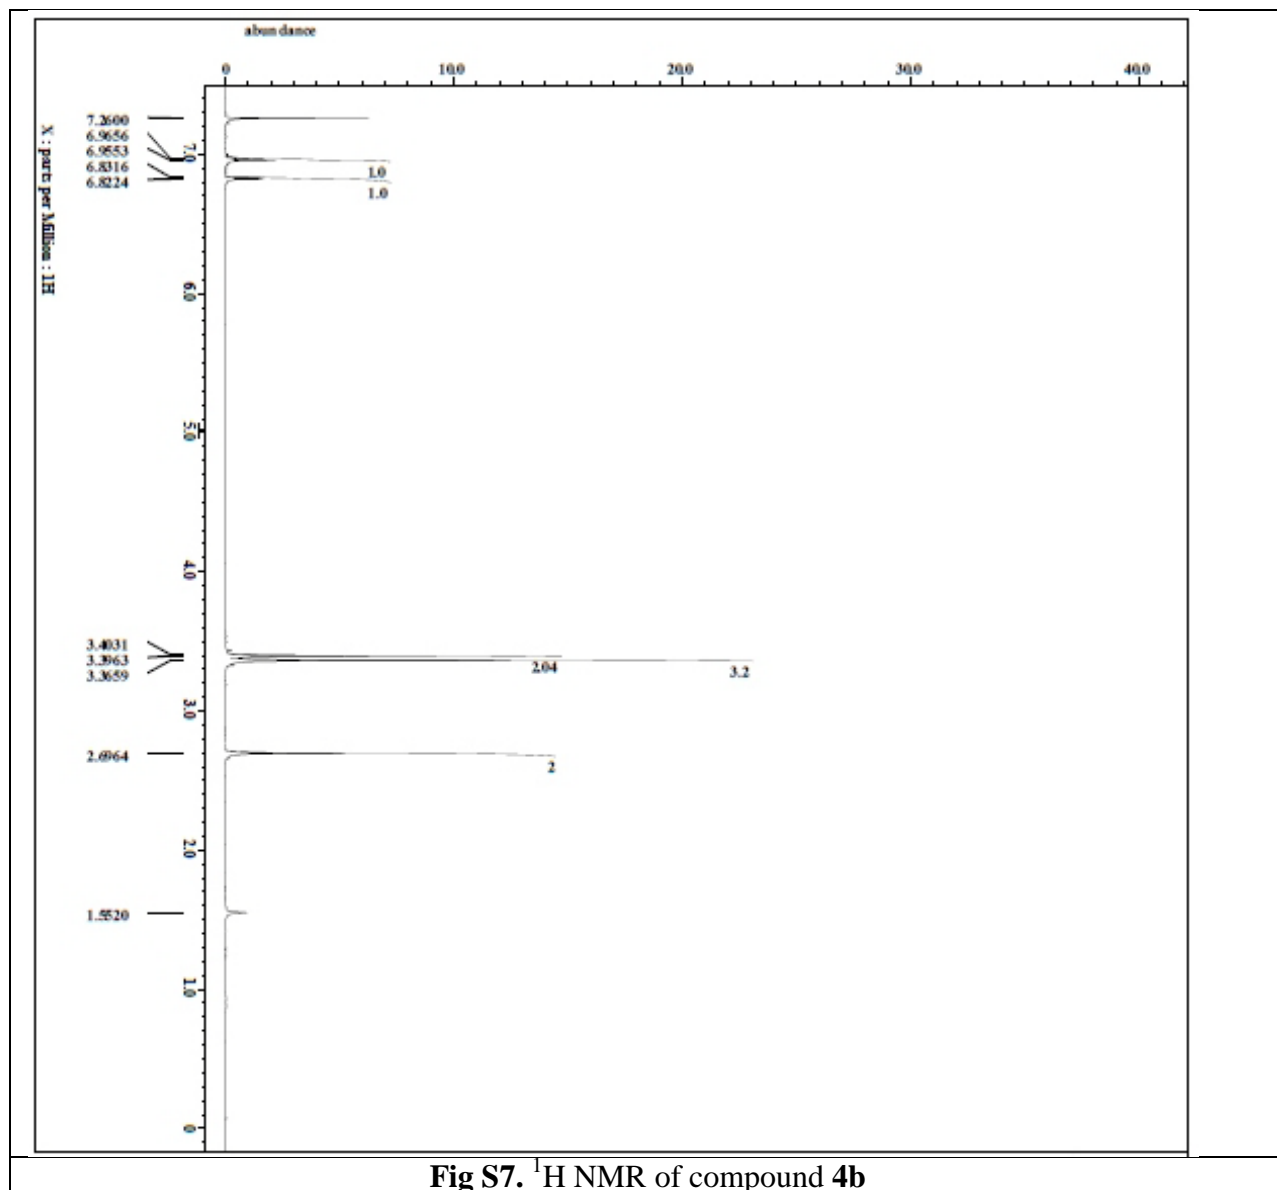

**Fig S7.** <sup>1</sup>H NMR of compound **4b**

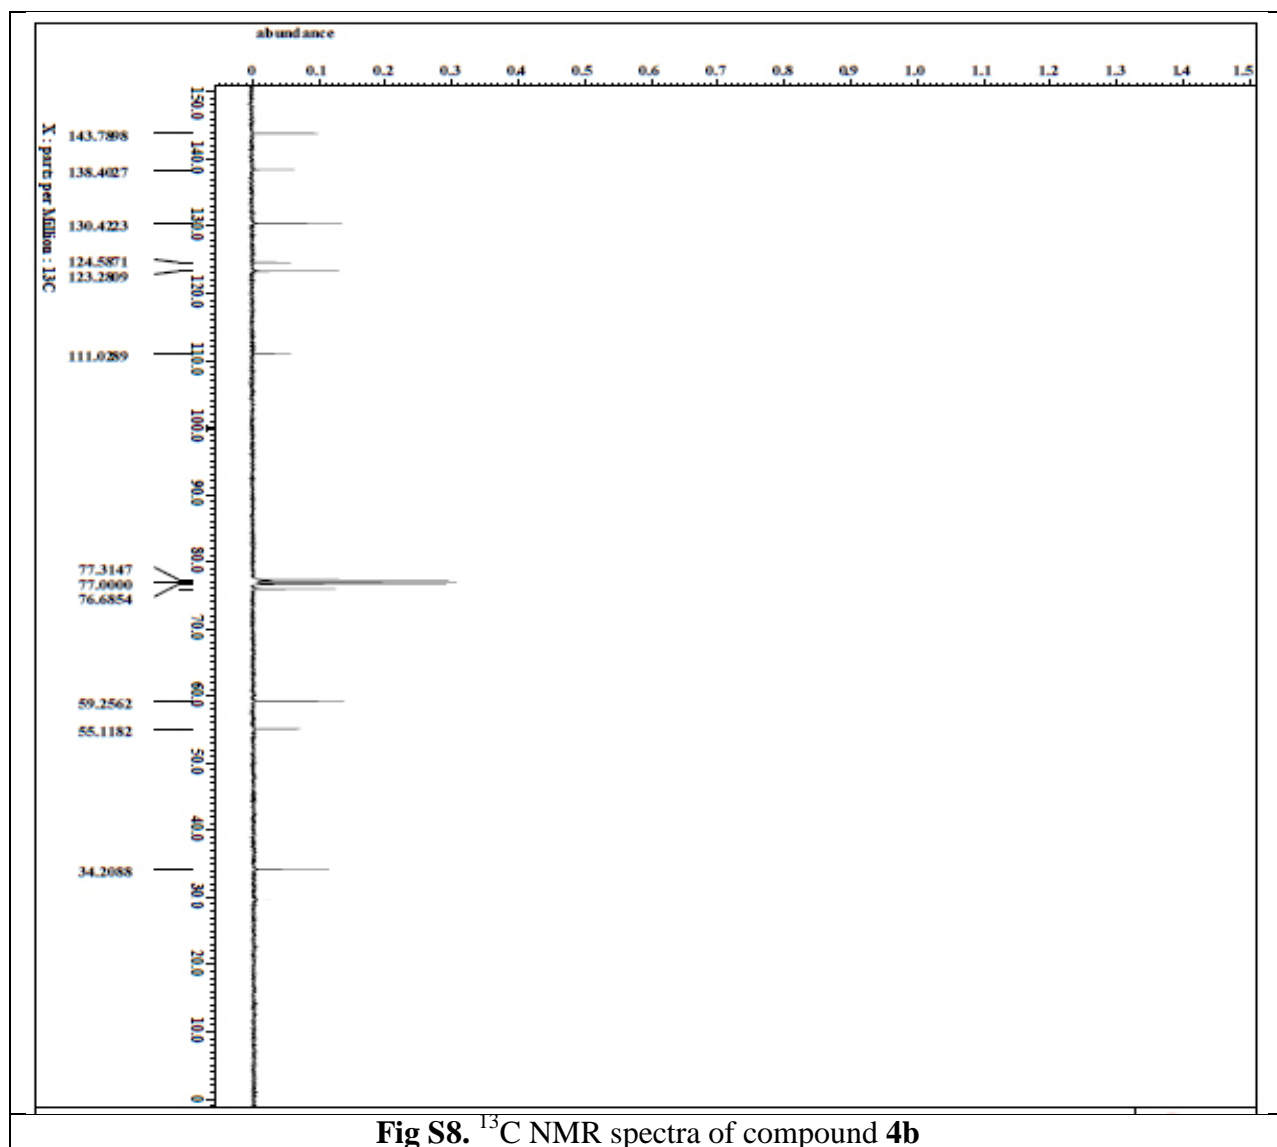

**Fig S8.**  $^{13}\text{C}$  NMR spectra of compound **4b**

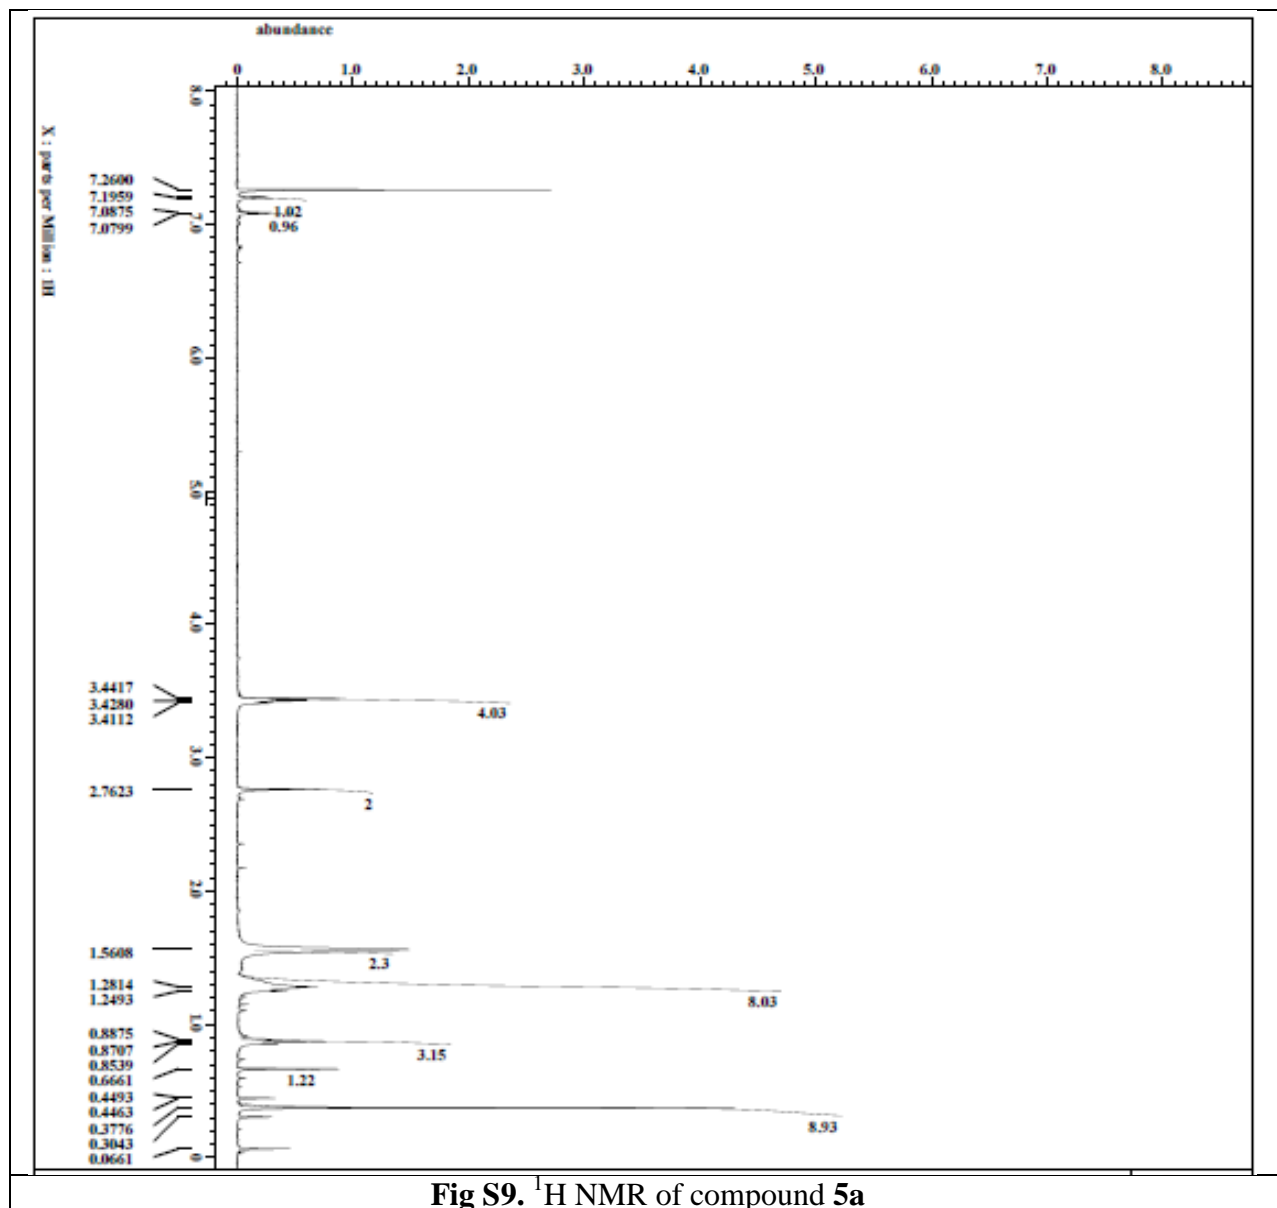

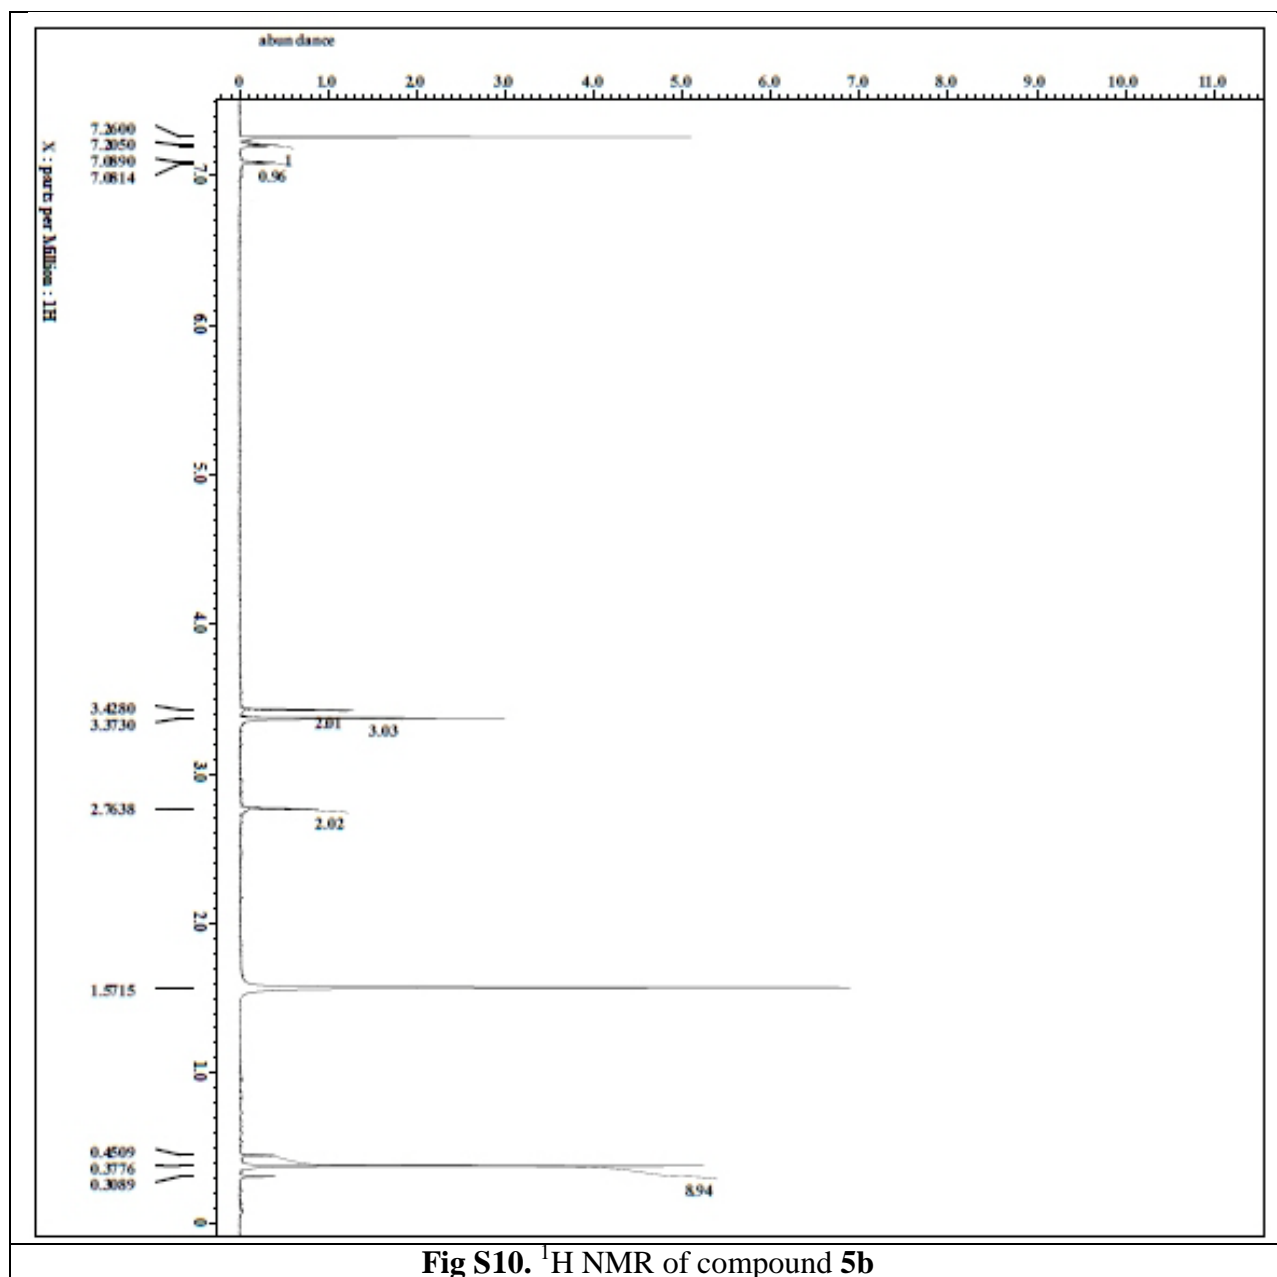

Fig S10. <sup>1</sup>H NMR of compound 5b

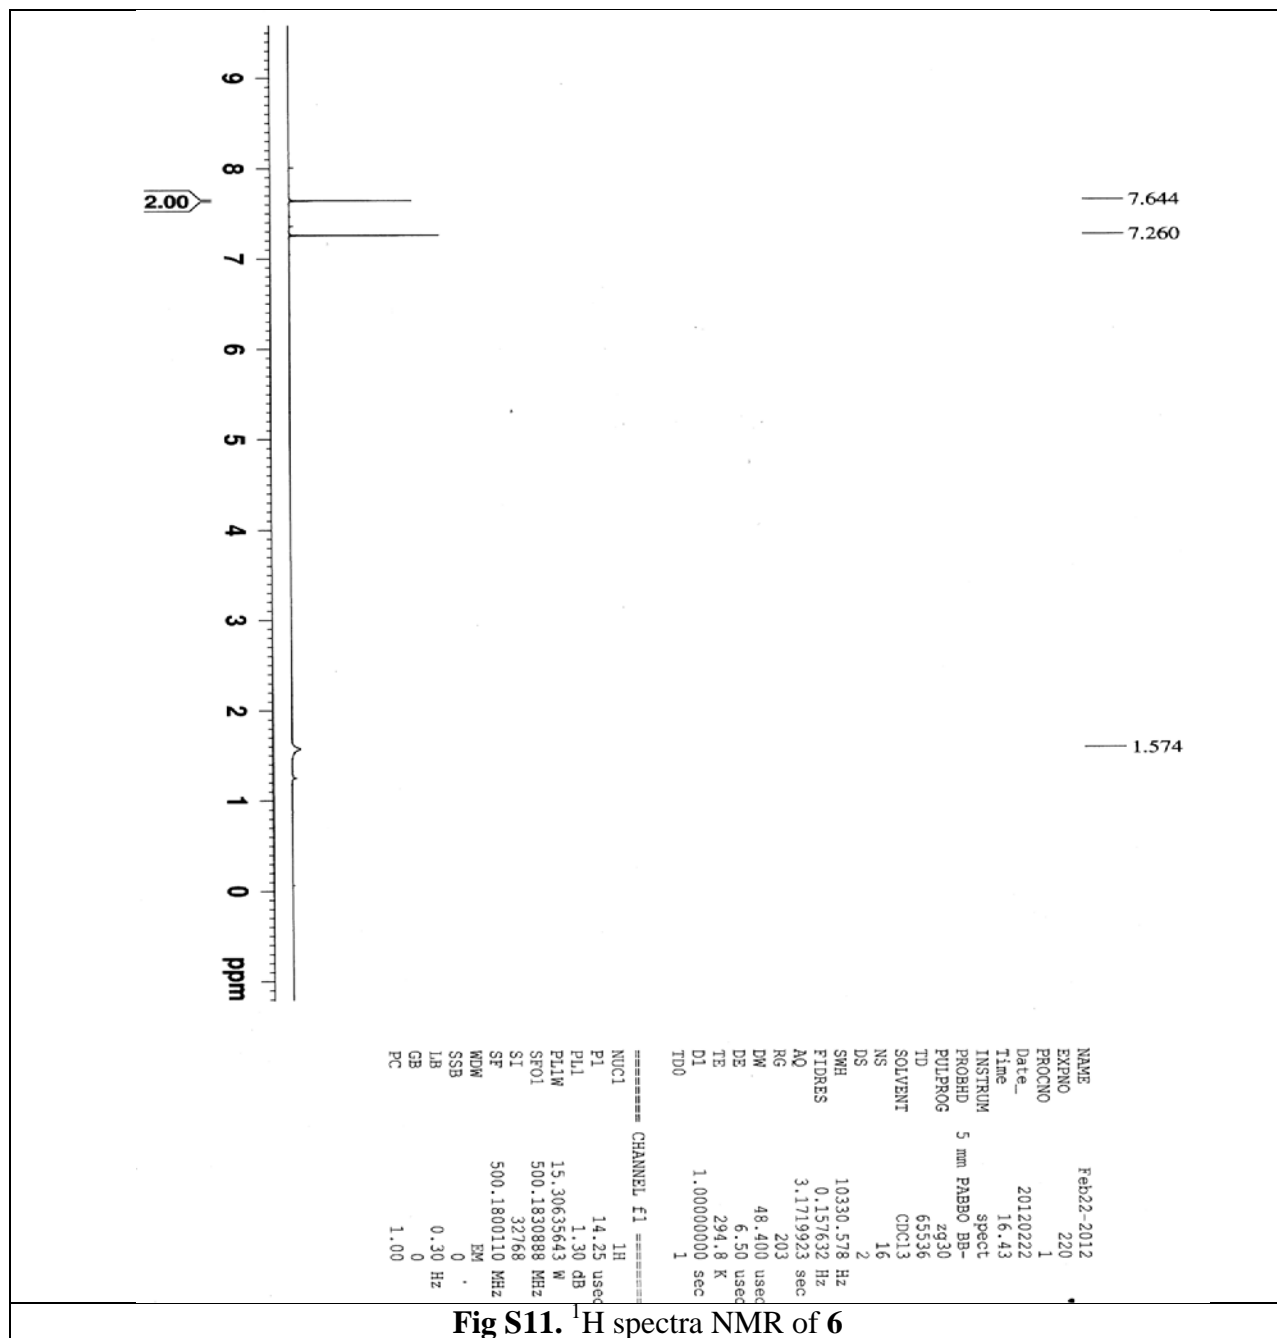

Fig S11. <sup>1</sup>H spectra NMR of 6

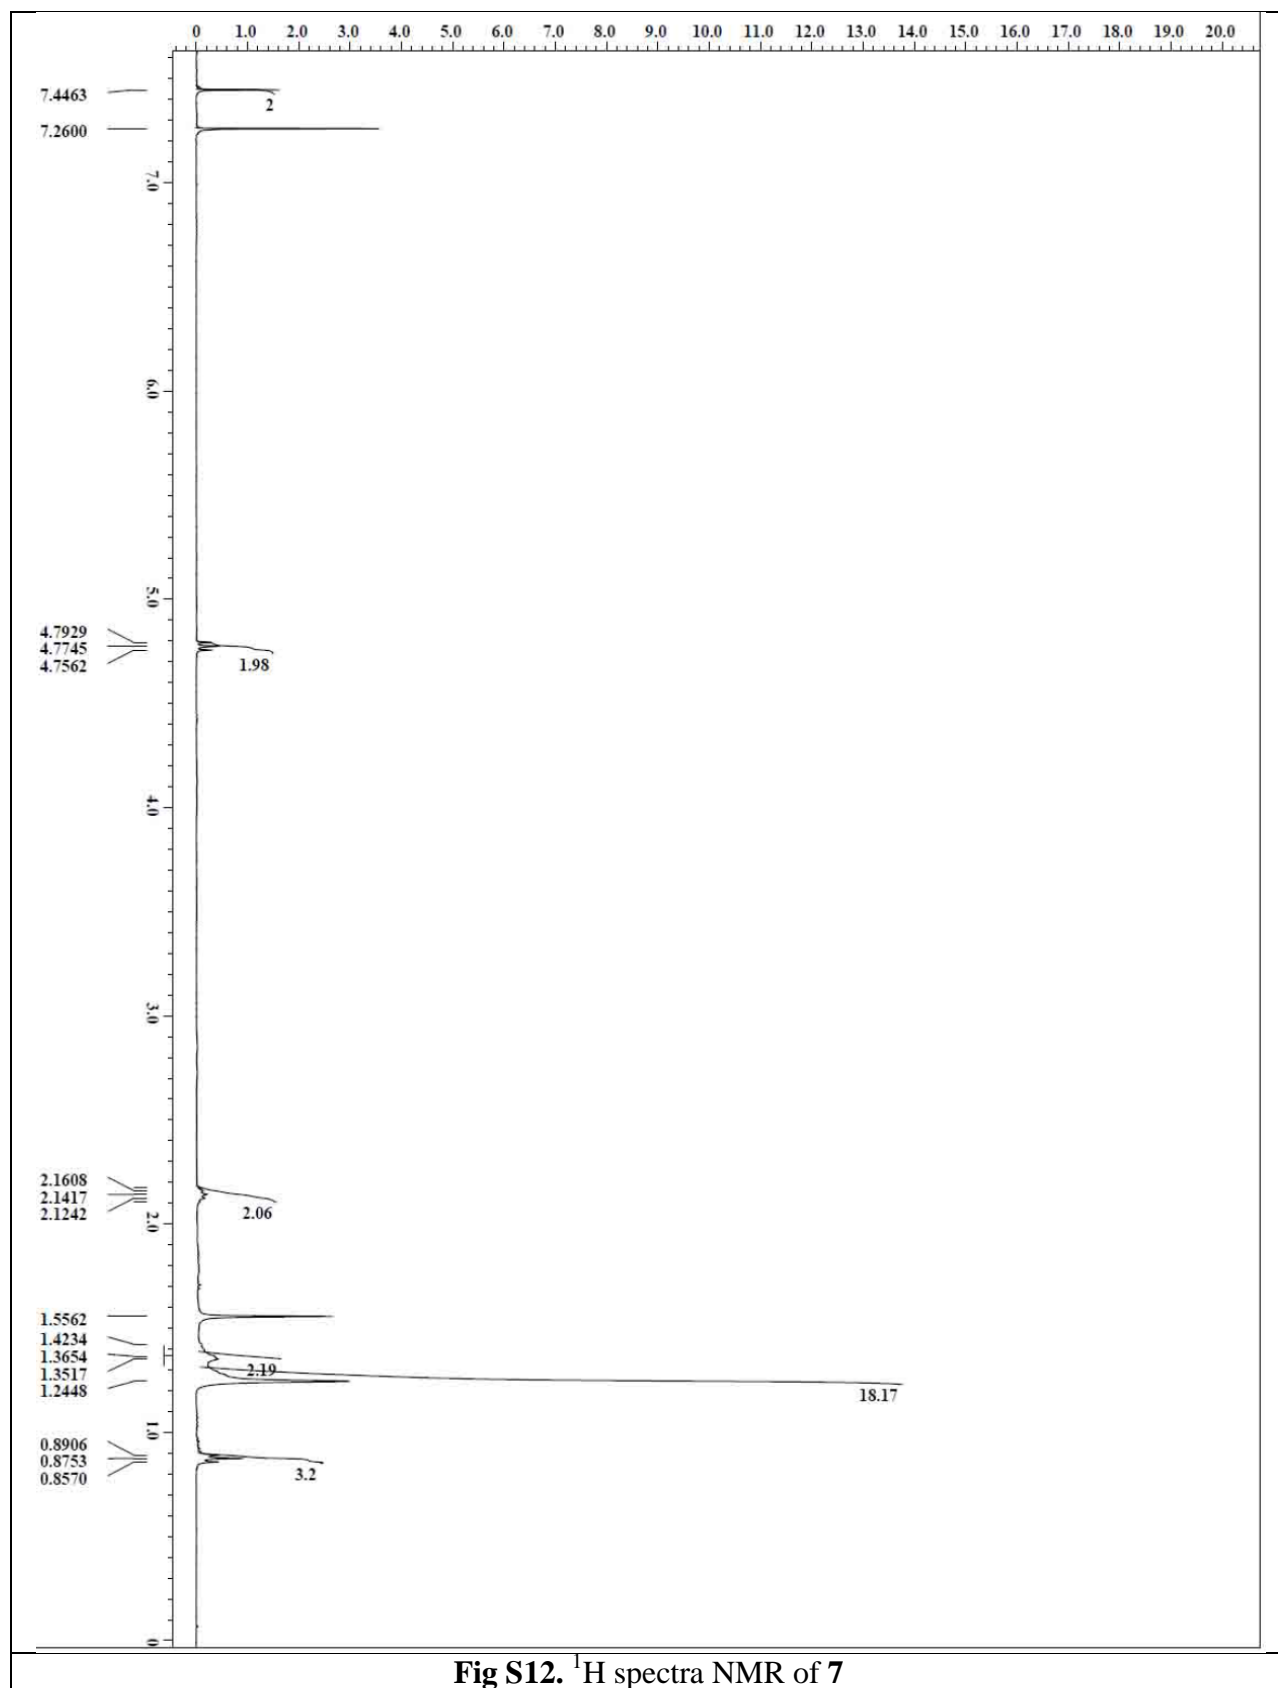

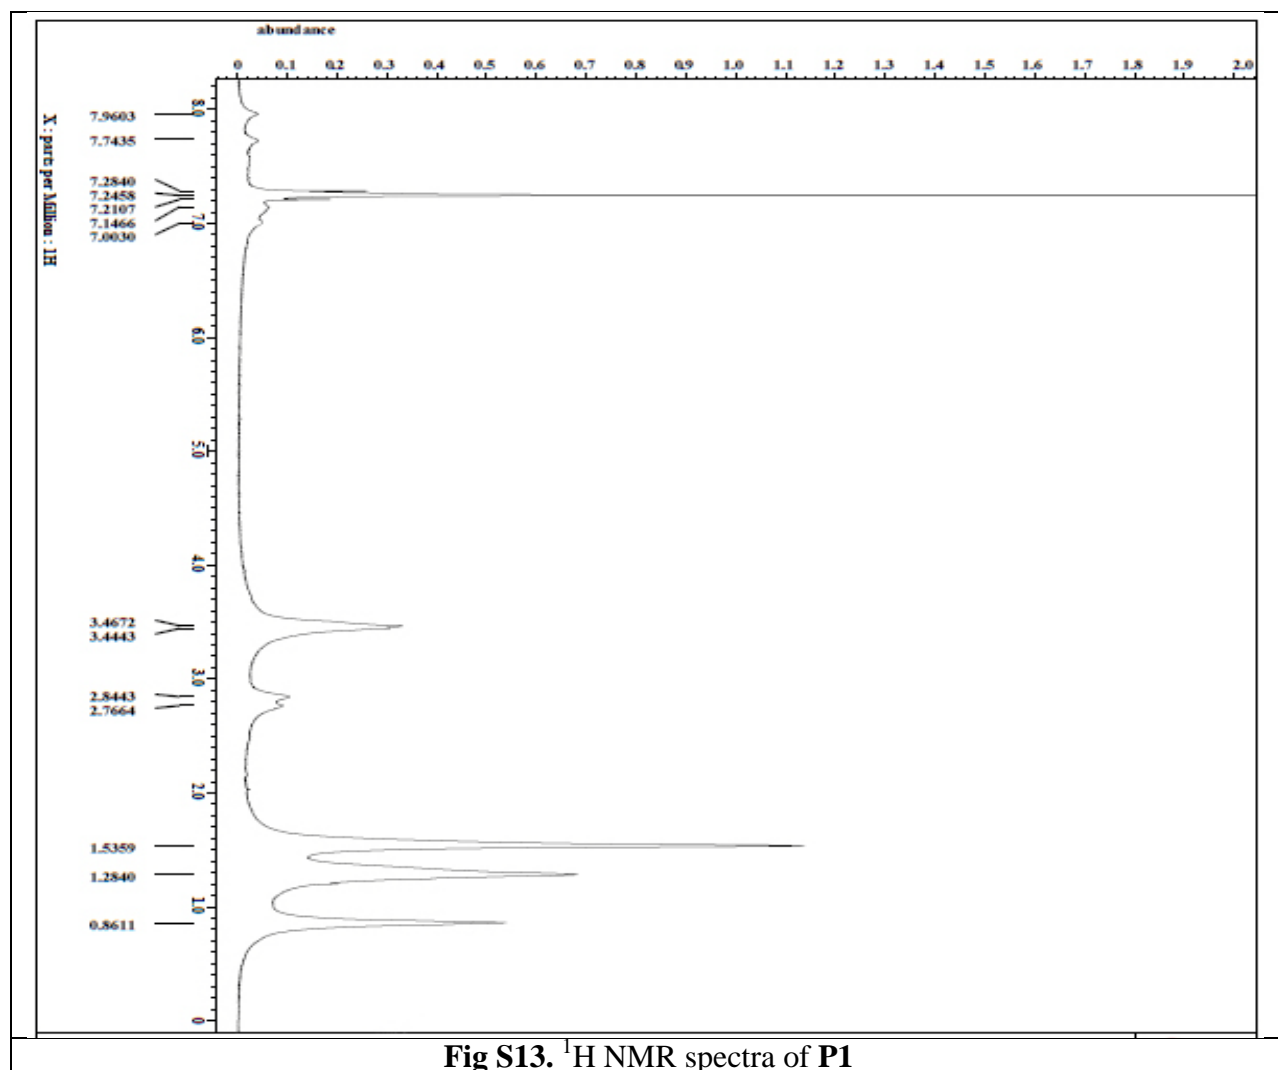

**Fig S13.** <sup>1</sup>H NMR spectra of P1

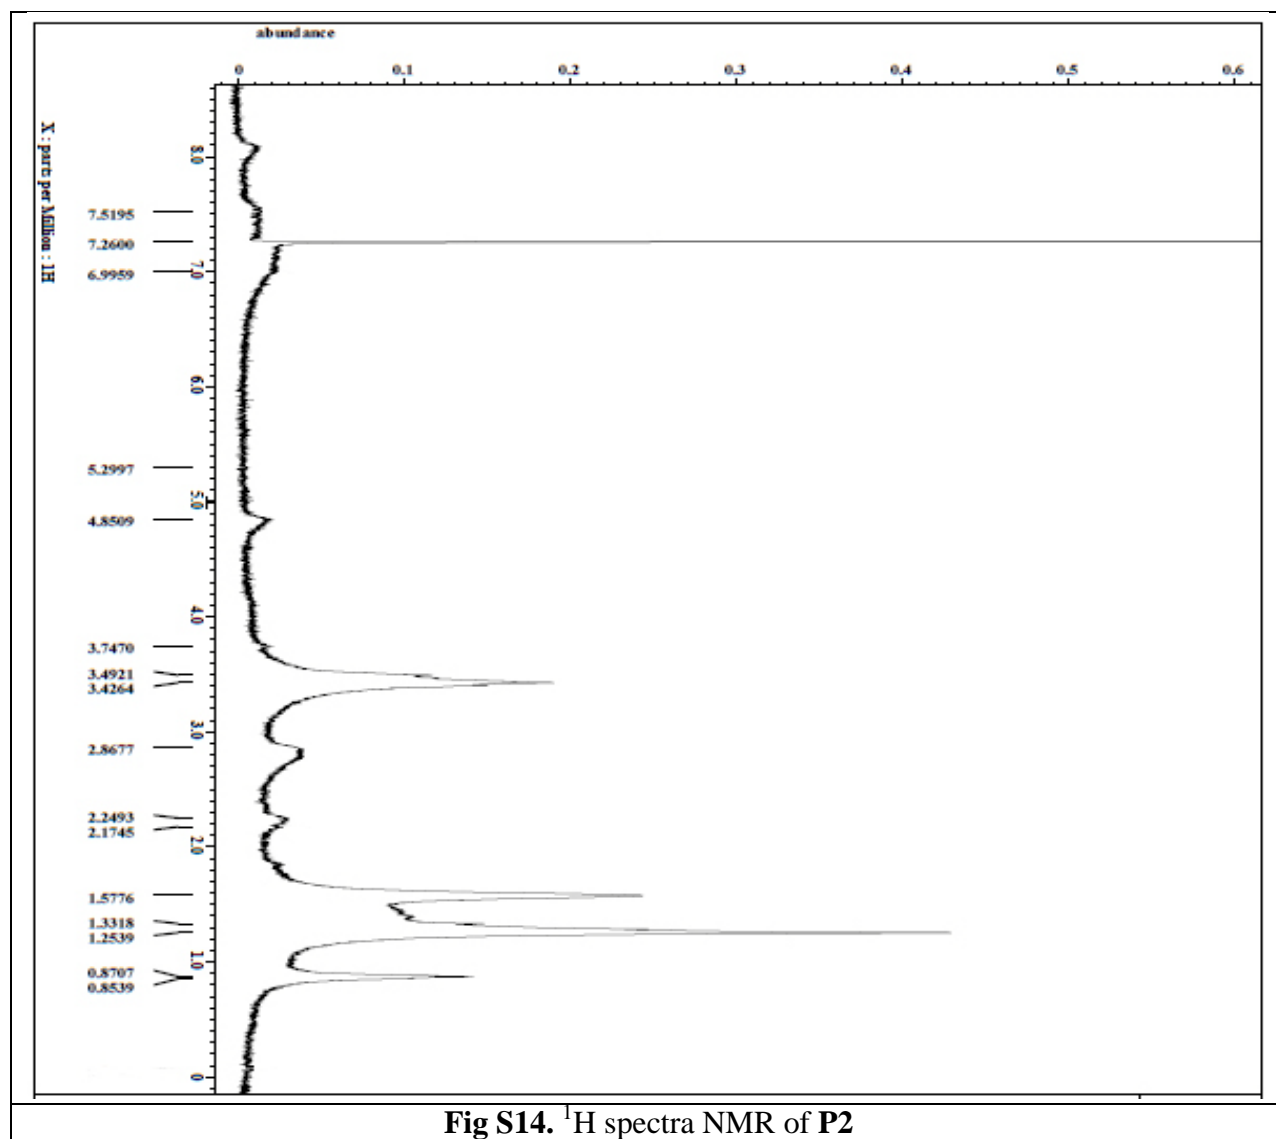

Fig S14.  $^1\text{H}$  spectra NMR of **P2**

## PXRD

The PXRD patterns (Fig. 4) for both the polymers were obtained after annealing their drop cast films (from chloroform solution) at 150 °C. Bragg reflection peaks were observed around  $2\theta \approx 12^\circ$  and  $24^\circ$  for **P1** and  $21^\circ$  for **P2**. For **P1** the peak at  $2\theta \approx 12^\circ$  is too broad to be concluded as a result of side-chain ordering but the peaks at  $2\theta \approx 24^\circ$  and  $21^\circ$ , respectively for **P1** and **P2** could be attributed to  $\pi$ -stacking between the polymer chains. The broader angle peaks ( $2\theta \sim 24^\circ$  and  $21^\circ$ ) corresponds to the  $\pi$ -stacking distances of  $\sim 3.7 \text{ \AA}$  and  $\sim 4.3 \text{ \AA}$ . So the compounds have semi crystalline nature as they did not exhibit any  $T_g$  or crystallisation during DSC between 25-250 °C but possess  $\pi$ -stacking.



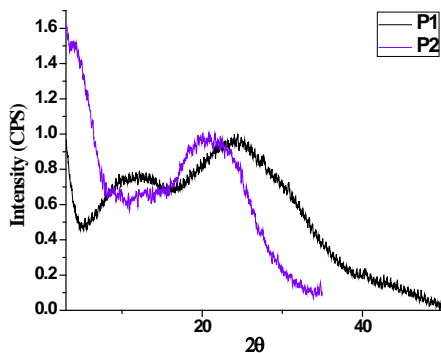

**Fig S15.** PXRD for **P1** and **P2**.

**P1** film was cycled 90 times between 0.0 and +1.2 V (Figure 15a) and **P2** film was cycled 90 times between 0.0 and +0.9 V (Figure 15a). The total charge decrease between the initial and 90th cycle was significant for **P1**, however, **P2** showed minor change in the total charge. It indicates a better stability of **P2** than **P1** during the redox cycles.

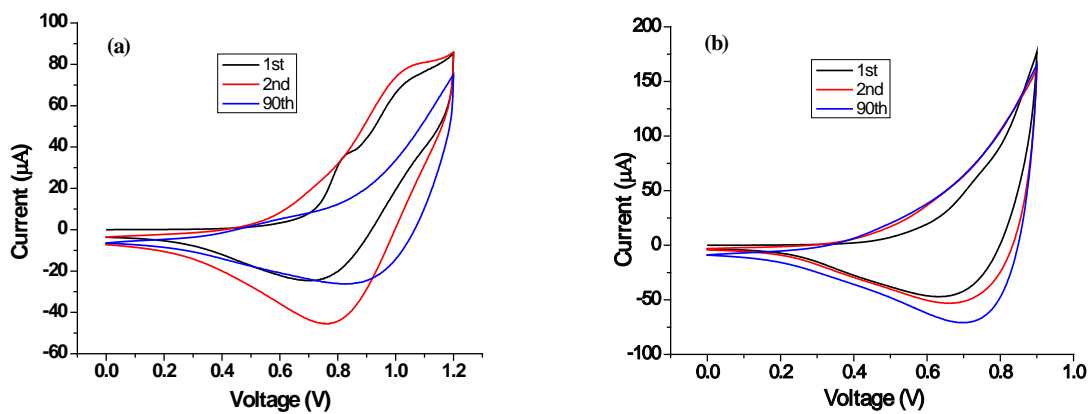

**Fig S16.** The CV of (a) **P1** and (b) **P2** in TBAPC at their 1<sup>st</sup>, 2<sup>nd</sup> and 90<sup>th</sup> cycle using TBAPC as electrolyte for **P1** for **P2**.
